# Supplementary material
Source: PubMed Central journal article supplement (PMC4594873)
Supplement: NIHMS564609-supplement-1.pdf [file NIHMS564609-supplement-1.pdf]

Appendix 2. Number of drug-related deaths by ICD-10 category of underlying and immediate cause, Wisconsin, 1999-2008 (n=4828)

| ICD-10 category                                   | Underlying cause | Immediate cause |
|---------------------------------------------------|------------------|-----------------|
| A. Infectious diseases                            | 1                | 9               |
| C. Malignant Neoplasms                            | 6                | 5               |
| D. Other Neoplasms and blood diseases             | 0                | 1               |
| E. Endocrine, Nutritional, and Metabolic diseases | 9                | 12              |
| F. Mental and behavioral disorders                | 147              | 97              |
| G. Nervous sys diseases                           | 6                | 90              |
| I. Circulatory sys diseases                       | 90               | 351             |
| J. Respiratory sys diseases                       | 31               | 141             |
| K. Digestive sys diseases                         | 9                | 22              |
| N. Genitourinary sys diseases                     | 3                | 11              |
| R. Symptoms, signs, findings not else classified  | 0                | 276             |
| S. Injuries                                       | 0                | 193             |
| T. Injuries, burns, poisoning, etc                | 0                | 3610            |
| V. Transport accidents                            | 57               | 0               |
| W. Falls etc                                      | 191              | 2               |
| X. Poisoning etc                                  | 3962             | 8               |
| Y. Other external causes                          | 316              | 0               |
| Total deaths                                      | 4828             | 4828            |

NOTE: Deaths are allowed to have only one underlying cause and one immediate cause. Contributing causes are not shown above.
